# Supplementary material for: SomaticSignatures: inferring mutational signatures from single-nucleotide variants
Source: PubMed Central journal article supplement (PMC4817139; doi:10.1093/bioinformatics/btv408), 2015-07-10
Supplement: supp_btv408_somatic-signatures-figS1.pdf [file supp_btv408_somatic-signatures-figS1.pdf]

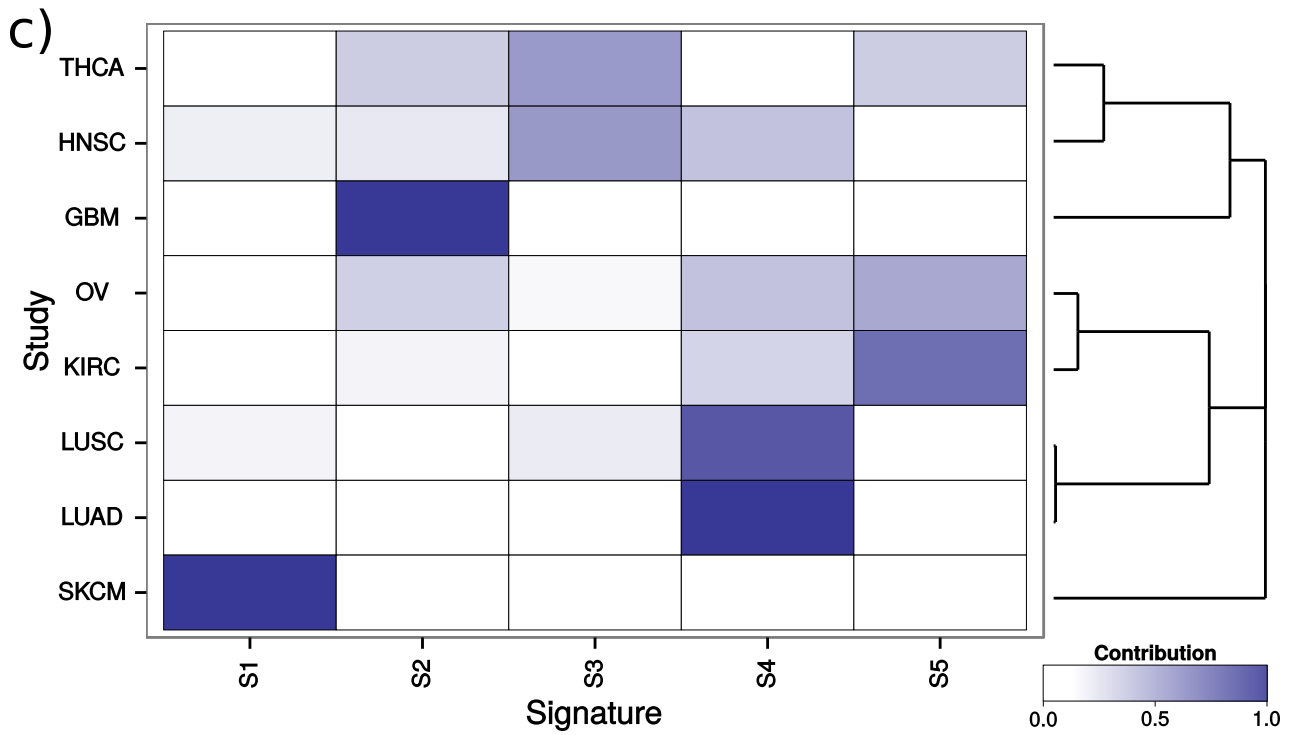

**Supplementary Figure S1:** Annotated high-resolution version of Figure 1

Analysis of mutational signatures for eight TCGA studies (Gehring, 2014). The observed mutational spectrum of each study (panel a) was decomposed into 5 distinct mutational signatures S1 to S5 (panel b, where the sum of all contributions per sample is normalized to 1) with NMF. The presence of these signatures in the studies (panel c), as shown by hierarchical clustering with cosine similarity as distance measure, underlines the similarities in mutational processes of biologically related cancer types.

Cancer types:

- GBM: glioblastoma multiforme
- HNSC: head and neck squamous cell carcinoma
- KIRC: kidney chromophobe
- LUAD: lung adenocarcinoma
- LUSC: lung squamous cell carcinoma
- OV: ovarian serous cystadenocarcinoma
- SKCM: skin cutaneous melanoma
- THCA: thyroid carcinoma
